# Supplementary material for: Insights into the specific feature of the electrostatic recognition binding mechanism between BM2 and BM1: a molecular dynamics simulation study
Source: Royal Society of Chemistry journal article supplement (doi:10.1039/d4cp01936a), 2024-01-01
Supplement: d4cp01936a1.pdf [file d4cp01936a1.pdf]

## Supporting Information

# Insights into the specific feature of electrostatic recognition binding mechanism between BM2 and BM1: A molecular dynamics simulations study

Guixuan Xing<sup>b</sup>, Qingchuan Zheng<sup>a,b\*</sup>

<sup>a</sup>School of Pharmaceutical Sciences, Jilin University, Changchun, 130023, China

<sup>b</sup>Institute of Theoretical Chemistry, College of Chemistry, Jilin University, Changchun,  
130023, China

**\*Corresponding authors**

E-mail addresses: zhengqc@jlu.edu.cn (Qingchuan Zheng).

## FIGURE CAPTIONS

**Figure S1** Initial model and distance monitoring of the BM2-BM1 complex.

**Figure S2** The Root Mean Square Fluctuation of the residue backbone atoms.

**Figure S3** B-factor analysis of the complex system. Close to red indicates that the residue is more flexible, and close to blue indicates that the residue is more stable.

**Figure S4** Distance between negatively charged O atoms and positively charged N atoms in the R1 region of the Wild-Type system.

**Figure S5** Distance between negatively charged O atoms and positively charged N atoms in the R2 region of the Wild-Type system.

**Figure S6** Distance between negatively charged O atoms and positively charged N atoms in the R3 region of the Wild-Type system.

**Figure S7** RMSD as a function of time for three groups of mutant systems and RMSF values of four systems.

**Figure S8** Free energy landscape of the 92-94A system. The star marks the lowest energy conformation of the system.

**Figure S9** The distance between the C terminal residue of the chain A and the chain D of BM1 protein and the charged residues in the R1 region.

**Figure S10** The distance between the charged residue atoms in the R1' region of the 92-94A system.

**Figure S11** The distance between the charged residue atoms in the R2 region of the 92-94A system.

**Figure S12** The distance between the charged residue atoms in the R3 region of the 92-94A system.

**Figure S13** Free energy landscape of the 89-91A system. The star marks the lowest energy conformation of the system.

**Figure S14** The distance between the charged residue atoms in the 89-91A system.

**Figure S15** Free energy landscape of the 98-100A system. The star marks the lowest energy conformation of the system.

**Figure S16** Distance between negatively charged O atoms and positively charged N atoms in the R1 region of the 98-100A system.

**Figure S17** Distance between negatively charged O atoms and positively charged N atoms in the R2 and R3 region of the 98-100A system.

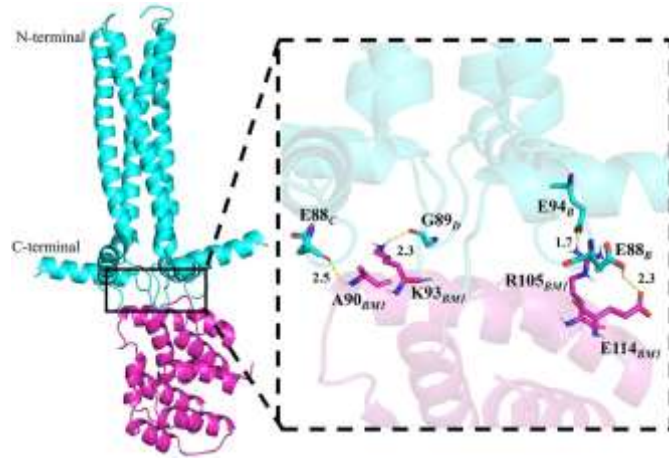

Figure S1 Initial model and distance monitoring of the BM2-BM1 complex.

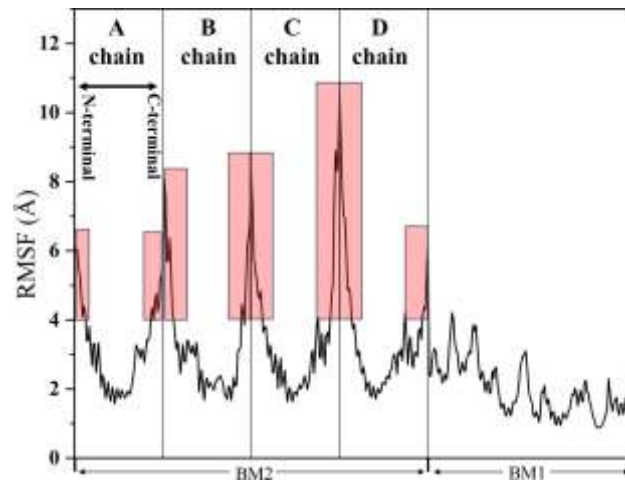

Figure S2 The Root Mean Square Fluctuation of the residue backbone atoms.

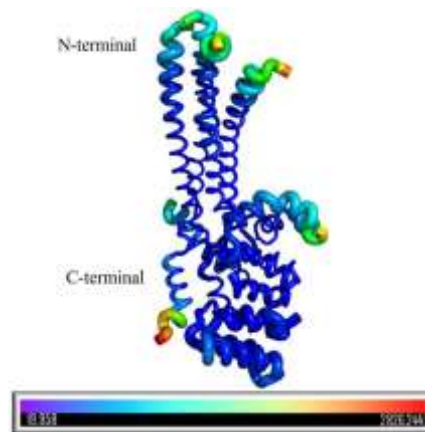

Figure S3 B-factor analysis of complex system. Close to red indicates that the residue is more flexible, and close to blue indicates that the residue is more stable.

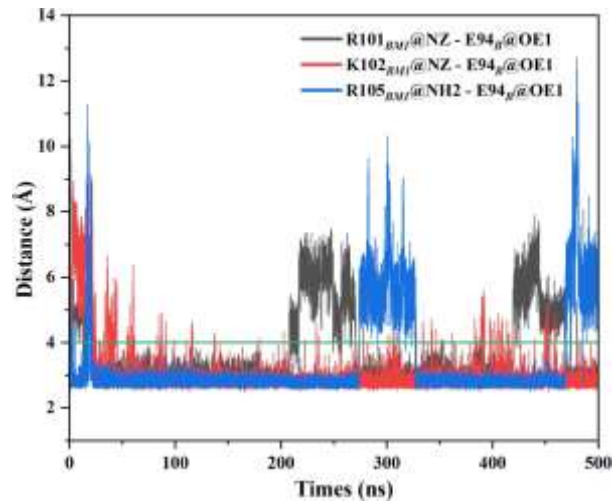

Figure S4 Distance between negatively charged O atoms and positively charged N atoms in the R1 region of the Wild-Type system.

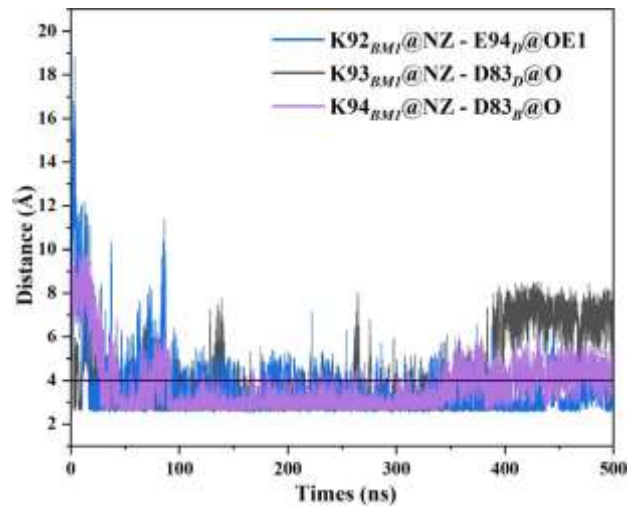

Figure S5 Distance between negatively charged O atoms and positively charged N atoms in the R2 region of the Wild-Type system.

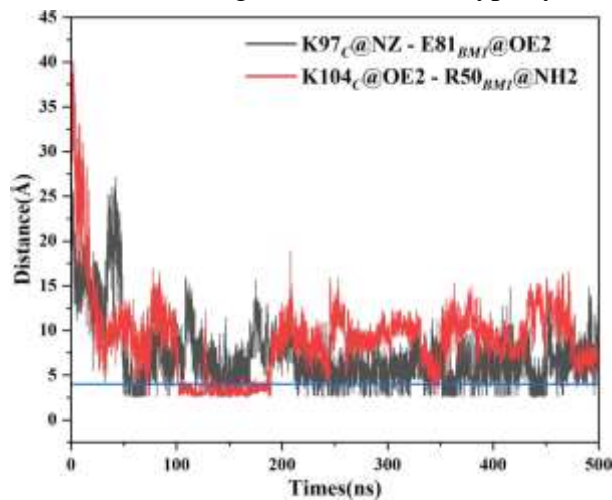

Figure S6 Distance between negatively charged O atoms and positively charged N atoms in the R3 region of the Wild-Type system.

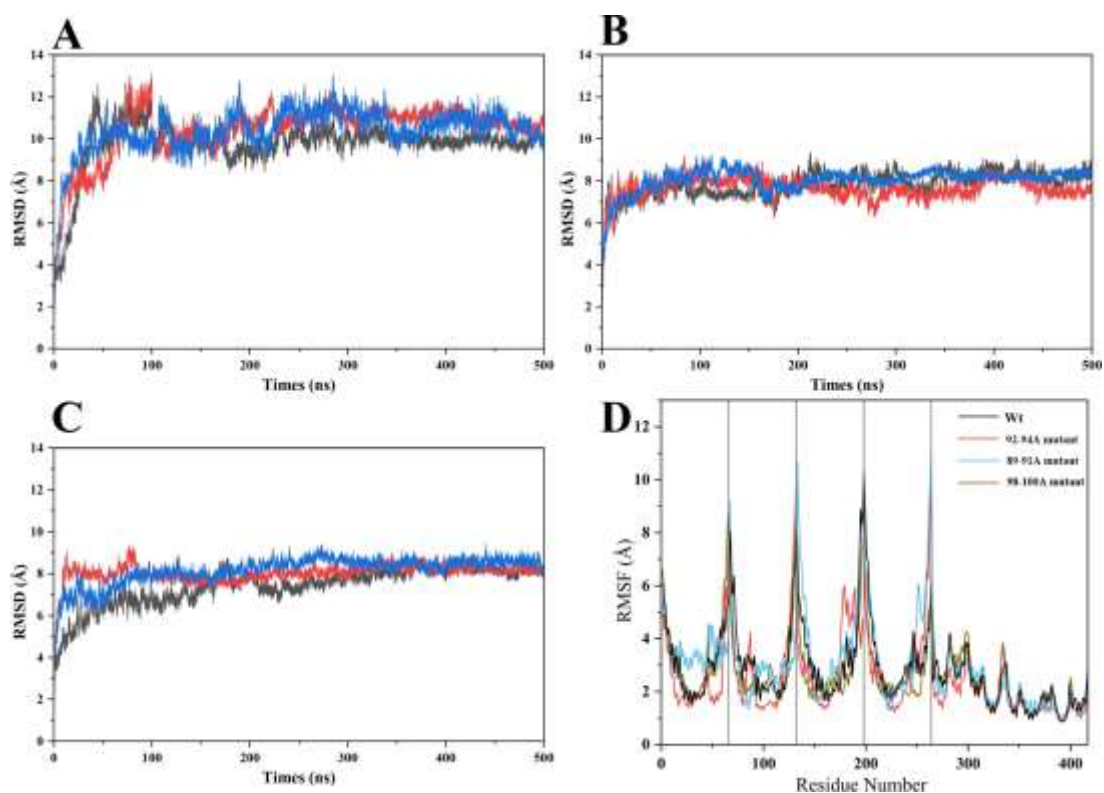

Figure S7 RMSD as a function of time for three groups of mutant systems and RMSF values of four systems.

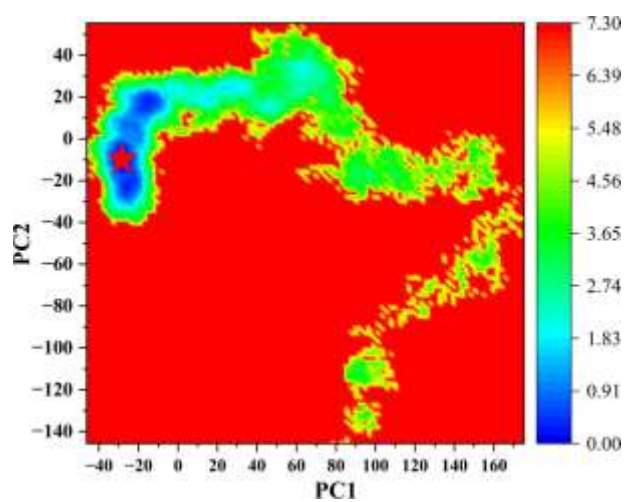

Figure S8 Free energy landscape of the 92-94A system. The star marks the lowest energy conformation of the system.

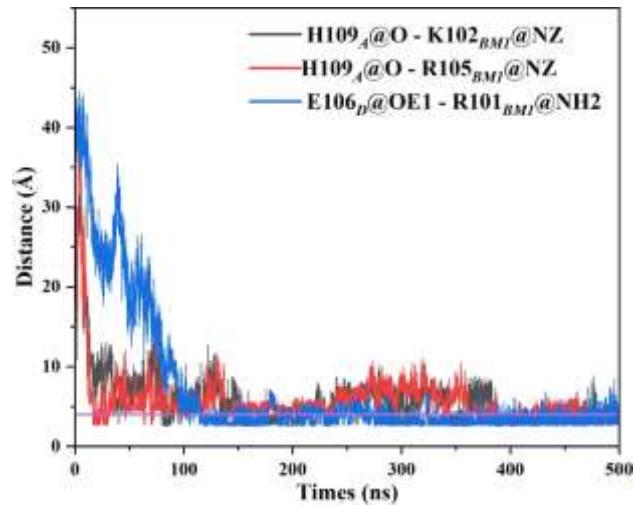

Figure S9 The distance between the C terminal residue of the chain A and the chain D of BM1 protein and the charged residues in the R1 region.

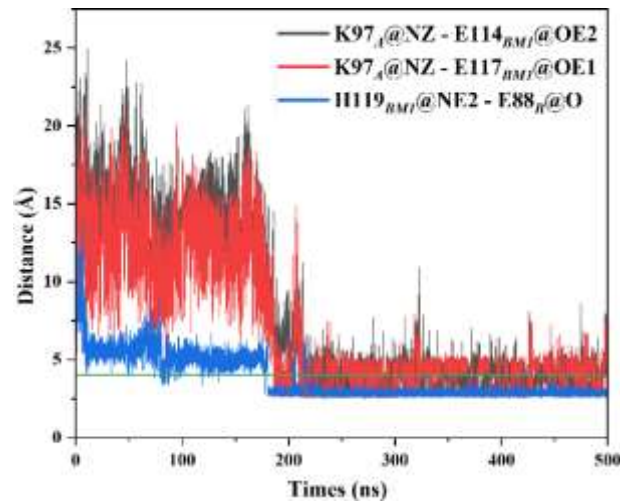

Figure S10 The distance between the charged residue atoms in the R1' region of the 92-94A system.

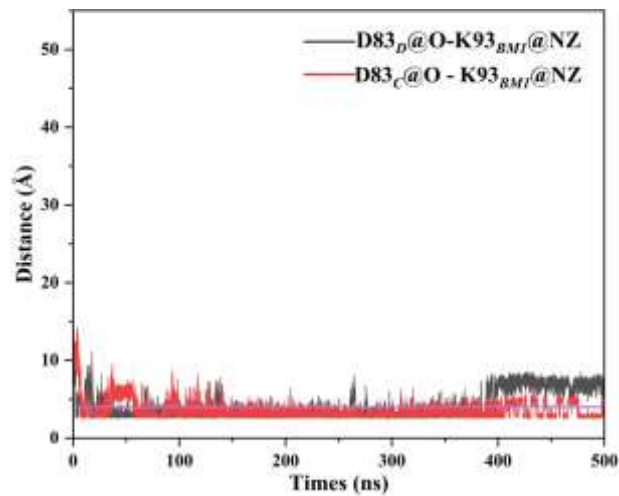

Figure S11 The distance between the charged residue atoms in the R2 region of the 92-94A system.

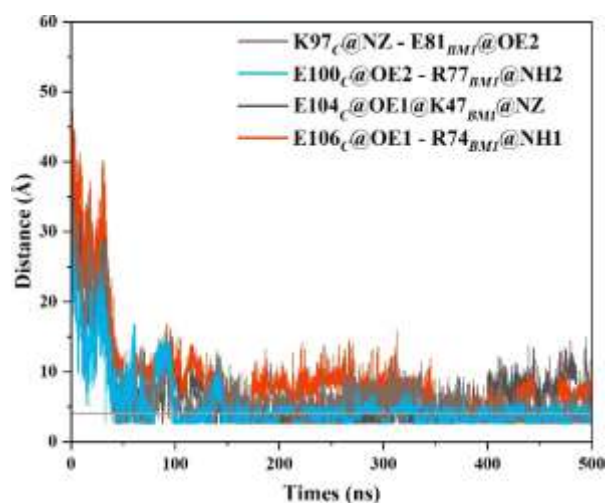

Figure S12 The distance between the charged residue atoms in the R3 region of the 92-94A system.

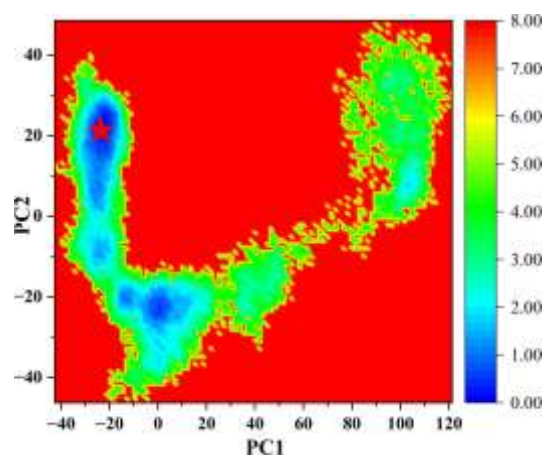

Figure S13 Free energy landscape of the 89-91A system. The star marks the lowest energy conformation of the system.

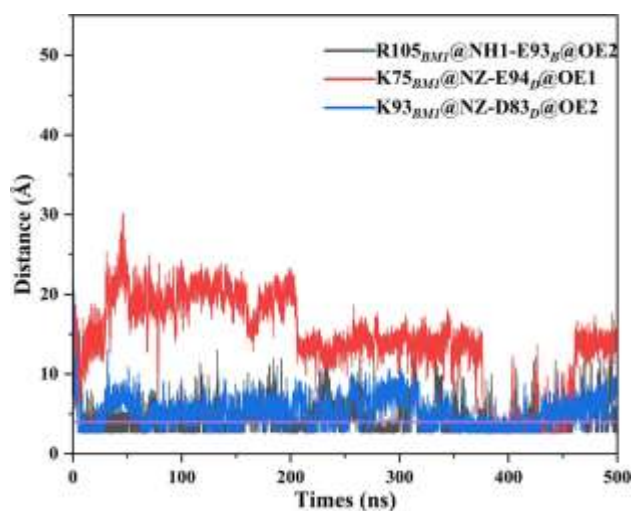

Figure S14 The distance between the charged residue atoms in the 89-91A system.



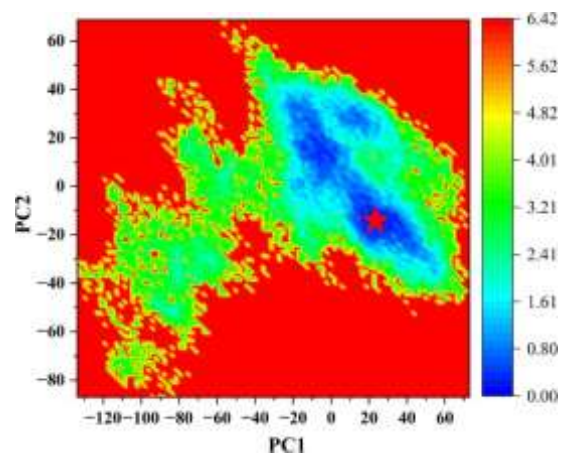

Figure S15 Free energy landscape of the 98-100A system. The star marks the lowest energy conformation of the system.

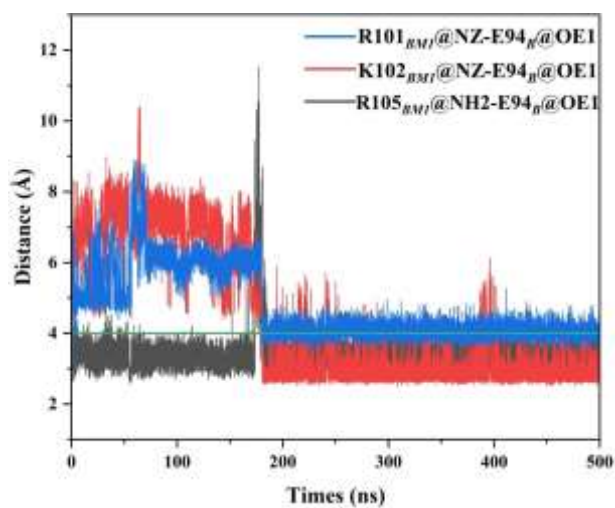

Figure S16 Distance between negatively charged O atoms and positively charged N atoms in the R1 region of the 98-100A system.

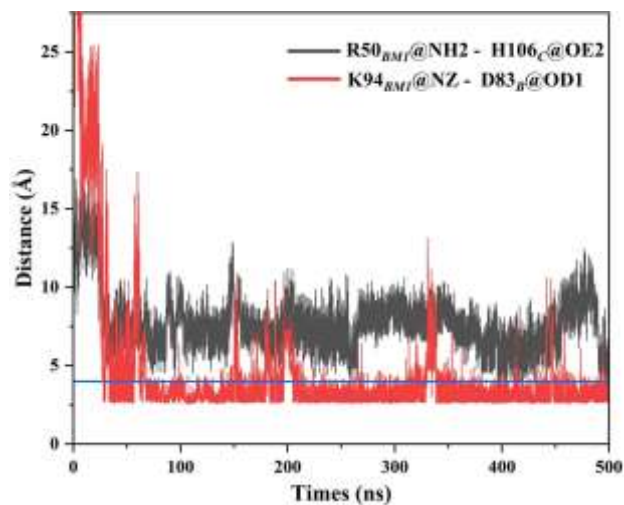

Figure S17 Distance between negatively charged O atoms and positively charged N atoms in the R2 and R3 region of the 98-100A system.

## TABLE LISTS

**Table S1** The binding free energies ( $\text{kcal}\cdot\text{mol}^{-1}$ ) contributed by key residues ( $\Delta G_{\text{bind}} \leq -2.0 \text{ kcal}\cdot\text{mol}^{-1}$ ) in the Wild-Type system.

**Table S2** Occupancy of hydrogen bond interactions in the three regions of BM2 and BM1 binding interface in the Wild-Type system.

**Table S3** The binding free energy and its components ( $\text{kcal}\cdot\text{mol}^{-1}$ ) of the Wild-Type system and three mutation complex systems (92-94A, 89-91A, 98-100A).

**Table S4** Table S4 The binding free energies ( $\text{kcal}\cdot\text{mol}^{-1}$ ) contributed by key residues ( $\Delta G_{\text{bind}} \leq -2.0 \text{ kcal}\cdot\text{mol}^{-1}$ ) in the 92-94A system.

**Table S5** Occupancy of hydrogen bond interactions in the four regions of BM2 and BM1 binding interface in the 92-94A system.

**Table S6** The binding free energies ( $\text{kcal}\cdot\text{mol}^{-1}$ ) contributed by key residues ( $\Delta G_{\text{bind}} \leq -2.0 \text{ kcal}\cdot\text{mol}^{-1}$ ) in the 89-91A system.

**Table S7** Occupancy of hydrogen bond interactions in the four regions of BM2 and BM1 binding interface in the 89-91A system.

**Table S8** The binding free energies ( $\text{kcal}\cdot\text{mol}^{-1}$ ) contributed by key residues ( $\Delta G_{\text{bind}} \leq -2.0 \text{ kcal}\cdot\text{mol}^{-1}$ ) in the 98-100A system.

**Table S9** Occupancy of hydrogen bond interactions in the four regions of BM2 and BM1 binding interface in the 98-100A system.

Table S1 The binding free energies (kcal·mol<sup>-1</sup>) contributed by key residues  
( $\Delta G_{\text{bind}} \leq -2.0$  kcal·mol<sup>-1</sup>) in the Wild-Type system.

|                    | <b>Residue</b>      | $\Delta E_{\text{vdw}}$ | $\Delta E_{\text{ele}}$ | $\Delta E_{\text{polar}}$ | $\Delta E_{\text{nonpol}}$ | $\Delta E_{\text{total}}$ |
|--------------------|---------------------|-------------------------|-------------------------|---------------------------|----------------------------|---------------------------|
| BM2                | E94 <sub>B</sub>    | -1.73                   | -113.96                 | 98.11                     | -0.59                      | -18.17                    |
|                    | E104 <sub>B</sub>   | 0.61                    | -92.15                  | 85.77                     | -0.26                      | -6.03                     |
|                    | E93 <sub>B</sub>    | 0.25                    | -65.45                  | 60.45                     | -0.01                      | -4.77                     |
|                    | I87 <sub>A</sub>    | -3.73                   | -3.34                   | 3.76                      | -0.34                      | -3.65                     |
|                    | L90 <sub>D</sub>    | -3.54                   | 1.85                    | -1.07                     | -0.58                      | -3.34                     |
|                    | L85 <sub>D</sub>    | -1.22                   | -7.97                   | 6.43                      | -0.36                      | -3.12                     |
|                    | T101 <sub>C</sub>   | -3.12                   | -5.06                   | 5.74                      | -0.66                      | -3.10                     |
|                    | I85 <sub>A</sub>    | -3.27                   | 1.15                    | 0.11                      | -0.62                      | -2.64                     |
|                    | L60 <sub>B</sub>    | -2.72                   | -7.09                   | 7.54                      | -0.29                      | -2.55                     |
|                    | E94 <sub>C</sub>    | -1.28                   | -73.09                  | 72.51                     | -0.46                      | -2.32                     |
| BM1                | R105 <sub>BM1</sub> | -0.83                   | -312.86                 | 303.95                    | -0.58                      | -10.32                    |
|                    | R101 <sub>BM1</sub> | -3.45                   | -292.52                 | 288.57                    | -0.70                      | -8.11                     |
|                    | M86 <sub>BM1</sub>  | -3.98                   | -3.38                   | 3.99                      | -0.81                      | -4.17                     |
|                    | R50 <sub>BM1</sub>  | -1.78                   | -181.06                 | 179.22                    | -0.45                      | -4.08                     |
|                    | I97 <sub>BM1</sub>  | -3.64                   | -0.03                   | 0.50                      | -0.66                      | -3.82                     |
|                    | K102 <sub>BM1</sub> | -2.07                   | -323.01                 | 322.60                    | -0.68                      | -3.16                     |
|                    | R77 <sub>BM1</sub>  | -0.10                   | -206.77                 | 203.99                    | -0.17                      | -3.06                     |
|                    | T53 <sub>BM1</sub>  | -1.90                   | -5.87                   | 5.08                      | -0.32                      | -3.00                     |
|                    | H119 <sub>BM1</sub> | -3.58                   | -5.59                   | 6.64                      | -0.37                      | -2.90                     |
|                    | E120 <sub>BM1</sub> | -4.33                   | -252.49                 | 254.86                    | -0.50                      | -2.46                     |
| K47 <sub>BM1</sub> | -0.84               | -190.47                 | 189.32                  | -0.19                     | -2.18                      |                           |
| L96 <sub>BM1</sub> | -2.14               | -1.72                   | 2.22                    | -0.43                     | -2.08                      |                           |

Table S2 Occupancy of hydrogen bond interactions in the three regions of BM2 and BM1 binding interface in the Wild-Type system.

|           | Acceptor               | Donor                    | AvgDist | Occupied (%) |
|-----------|------------------------|--------------------------|---------|--------------|
| R1 Region | E94 <sub>B</sub> @OE1  | R105 <sub>BM1</sub> @NH2 | 2.77    | 67.75        |
|           | E94 <sub>B</sub> @OE1  | R101 <sub>BM1</sub> @NH2 | 2.78    | 65.61        |
|           | E94 <sub>B</sub> @OE2  | K102 <sub>BM1</sub> @NZ  | 2.78    | 27.11        |
|           | E88 <sub>B</sub> @O    | K102 <sub>BM1</sub> @NZ  | 2.78    | 8.63         |
|           | G89 <sub>B</sub> @O    | H119 <sub>BM1</sub> @NE2 | 2.85    | 46.47        |
|           | E104 <sub>B</sub> @OE2 | R101 <sub>BM1</sub> @NH2 | 2.78    | 34.88        |
| R2 Region | S91 <sub>B</sub> @O    | K94 <sub>BM1</sub> @NZ   | 2.88    | 1.09         |
|           | I85 <sub>D</sub> @O    | K93 <sub>BM1</sub> @NZ   | 2.80    | 15.74        |
| R3 Region | E94 <sub>C</sub> @OE1  | M86 <sub>BM1</sub> @N    | 2.84    | 31.22        |
|           | T101 <sub>C</sub> @O   | D54 <sub>BM1</sub> @N    | 2.86    | 48.18        |
|           | E104 <sub>C</sub> @OE2 | C51 <sub>BM1</sub> @N    | 2.84    | 7.36         |

Table S3 The binding free energy and its components (kcal·mol<sup>-1</sup>) of the Wild-Type system and three mutation complex systems (92-94A, 89-91A, 98-100A).

| System                                 | BM2-BM1 complex system | 92-94A System | 89-91A System | 98-100A System |
|----------------------------------------|------------------------|---------------|---------------|----------------|
| $\Delta E_{\text{ele}}$                | -1885.00               | -2083.35      | -1372.76      | -1293.03       |
| $\Delta E_{\text{vdW}}$                | -146.36                | -133.70       | -89.89        | -109.65        |
| $\Delta G_{\text{SA}}$                 | -23.24                 | -22.30        | -13.75        | -16.81         |
| $\Delta G_{\text{GB}}$                 | 1958.80                | 2124.74       | 1431.43       | 1353.07        |
| $\Delta G_{\text{pol}}^{\text{a}}$     | 73.80                  | 41.39         | 58.68         | 60.05          |
| $\Delta G_{\text{nonpol}}^{\text{b}}$  | -169.61                | -156.01       | -103.64       | -126.47        |
| $\Delta G_{\text{MM-GBSA}}^{\text{c}}$ | -95.80                 | -114.63       | -44.96        | -66.42         |
| T $\Delta S$                           | -91.89                 | -81.95        | -53.15        | -58.01         |
| $\Delta G_{\text{binding}}^{\text{d}}$ | -3.92                  | -32.68        | 8.18          | -8.42          |

$$^{\text{a}} \Delta G_{\text{pol}} = \Delta E_{\text{ele}} + \Delta G_{\text{GB}}$$

$$^{\text{b}} \Delta G_{\text{nonpol}} = \Delta E_{\text{vdW}} + \Delta G_{\text{SA}}$$

$$^{\text{c}} \Delta G_{\text{MM-GBSA}} = \Delta E_{\text{ele}} + \Delta E_{\text{vdW}} + \Delta G_{\text{GB}} + \Delta G_{\text{SASA}}$$

$$^{\text{d}} \Delta G_{\text{binding}} = \Delta G_{\text{MM-GBSA}} - T\Delta S$$

Table S4 The binding free energies (kcal·mol<sup>-1</sup>) contributed by key residues  
( $\Delta G_{\text{bind}} \leq -2.0$  kcal·mol<sup>-1</sup>) in the 92-94A system.

|     | Residue             | $\Delta E_{\text{vdW}}$ | $\Delta E_{\text{ele}}$ | $\Delta E_{\text{polar}}$ | $\Delta E_{\text{nonpol}}$ | $\Delta E_{\text{total}}$ |
|-----|---------------------|-------------------------|-------------------------|---------------------------|----------------------------|---------------------------|
|     | K97 <sub>A</sub>    | -1.086                  | -92.578                 | 82.672                    | -0.77124                   | -11.7632                  |
|     | L90 <sub>C</sub>    | -5.641                  | -4.7407                 | 4.4405                    | -0.92022                   | -6.86142                  |
|     | H109 <sub>A</sub>   | -0.7095                 | -63.312                 | 59.9268                   | -0.28658                   | -4.38128                  |
|     | E100 <sub>B</sub>   | -0.9579                 | -50.6247                | 48.0381                   | -0.26547                   | -3.80997                  |
|     | L90 <sub>D</sub>    | -1.8789                 | -7.7803                 | 6.3729                    | -0.44666                   | -3.73296                  |
| BM2 | E106 <sub>C</sub>   | 0.7936                  | -65.2047                | 60.9972                   | -0.28609                   | -3.69999                  |
|     | L108 <sub>A</sub>   | -1.381                  | -10.7907                | 9.2267                    | -0.33961                   | -3.28461                  |
|     | I85 <sub>A</sub>    | -2.8074                 | 1.391                   | -1.0981                   | -0.56293                   | -3.07743                  |
|     | D83 <sub>C</sub>    | 0.2872                  | -88.3939                | 85.4739                   | -0.14406                   | -2.77686                  |
|     | L60 <sub>B</sub>    | -2.8577                 | -4.1112                 | 4.6166                    | -0.3622                    | -2.7145                   |
|     | E106 <sub>D</sub>   | -0.6344                 | -79.3482                | 78.3392                   | -0.36713                   | -2.01053                  |
|     | R74 <sub>BM1</sub>  | 0.4234                  | -201.2                  | 189.8906                  | -0.73443                   | -11.6202                  |
|     | R105 <sub>BM1</sub> | -0.8845                 | -263.455                | 253.5649                  | -0.69236                   | -11.4665                  |
|     | R77 <sub>BM1</sub>  | -4.6987                 | -196.791                | 193.8819                  | -0.85752                   | -8.46562                  |
|     | R101 <sub>BM1</sub> | -3.3305                 | -234.46                 | 233.0921                  | -0.99148                   | -5.68958                  |
|     | H119 <sub>BM1</sub> | -3.0676                 | -10.824                 | 11.0654                   | -0.43986                   | -3.26606                  |
| BM1 | E81 <sub>BM1</sub>  | -3.8425                 | -140.8904               | -139.423                  | -0.50025                   | -2.87575                  |
|     | K93 <sub>BM1</sub>  | -2.6392                 | -261.173                | 261.9647                  | -0.8685                    | -2.7162                   |
|     | I97 <sub>BM1</sub>  | -3.1571                 | -0.5191                 | 1.5432                    | -0.46824                   | -2.60124                  |
|     | K97 <sub>BM1</sub>  | -3.6486                 | 8.4641                  | -6.7214                   | -0.53969                   | -2.44559                  |
|     | K47 <sub>BM1</sub>  | -0.2886                 | -170.051                | 168.4381                  | -0.35909                   | -2.26099                  |
|     | L98 <sub>BM1</sub>  | -2.1612                 | 1.8997                  | -1.6133                   | -0.14572                   | -2.02052                  |

Table S5 Occupancy of hydrogen bond interactions in the four regions of BM2 and BM1 binding interface in the 92-94A system.

|            | <b>Acceptor</b>        | <b>Donor</b>             | <b>AvgDist</b> | <b>Occupied (%)</b> |
|------------|------------------------|--------------------------|----------------|---------------------|
| R1 Region  | H109 <sub>A</sub> @OXT | R105 <sub>BM1</sub> @NH2 | 2.76           | 43.80               |
|            | H109 <sub>A</sub> @OXT | K102 <sub>BM1</sub> @NZ  | 2.77           | 9.97                |
|            | E106 <sub>D</sub> @OXT | R101 <sub>BM1</sub> @NH1 | 2.81           | 38.60               |
| R1' Region | S91 <sub>A</sub> @N    | E120 <sub>BM1</sub> @OE2 | 2.94           | 1.03                |
|            | K97 <sub>A</sub> @NZ   | E117 <sub>BM1</sub> @OE2 | 2.91           | 2.07                |
|            | K97 <sub>A</sub> @NZ   | E114 <sub>BM1</sub> @OE1 | 2.84           | 0.04                |
| R2 Region  | L90 <sub>C</sub> @O    | T89 <sub>BM1</sub> @N    | 2.77           | 15.07               |
|            | L90 <sub>C</sub> @O    | K92 <sub>BM1</sub> @NZ   | 2.82           | 4.16                |
| R3 Region  | K97 <sub>C</sub> @HD2  | E81 <sub>BM1</sub> @OE1  | 2.95           | 0.55                |
|            | E104 <sub>C</sub> @OE1 | R76 <sub>BM1</sub> @NH1  | 2.78           | 1.83                |
|            | E104 <sub>C</sub> @OE1 | R4 <sub>BM1</sub> @NH1   | 2.77           | 10.9                |
|            | E106 <sub>C</sub> @O   | R74 <sub>BM1</sub> @NH2  | 2.78           | 27.55               |
|            | E100 <sub>C</sub> @O   | R77 <sub>BM1</sub> @NH1  | 2.84           | 41.97               |

Table S6 The binding free energies ( $\text{kcal}\cdot\text{mol}^{-1}$ ) contributed by key residues ( $\Delta G_{\text{bind}} \leq -2.0 \text{ kcal}\cdot\text{mol}^{-1}$ ) in the 89-91A system.

|     | Residue             | $\Delta E_{\text{vdW}}$ | $\Delta E_{\text{ele}}$ | $\Delta E_{\text{polar}}$ | $\Delta E_{\text{nonpol}}$ | $\Delta E_{\text{total}}$ |
|-----|---------------------|-------------------------|-------------------------|---------------------------|----------------------------|---------------------------|
| BM2 | A91 <sub>B</sub>    | -1.19145                | -6.8308                 | 4.05429                   | -0.37613                   | -4.3441                   |
|     | G88 <sub>B</sub>    | -1.95628                | -19.5339                | 18.18634                  | -0.60464                   | -3.90844                  |
|     | M98 <sub>D</sub>    | -3.55294                | -1.41872                | 2.49405                   | -0.76113                   | -3.23874                  |
|     | I95 <sub>D</sub>    | -2.78152                | -0.93961                | 1.26042                   | -0.42306                   | -2.88376                  |
|     | I87 <sub>D</sub>    | -2.38734                | 0.3183                  | 0.09765                   | -0.52793                   | -2.49932                  |
|     | A90 <sub>B</sub>    | -1.85181                | -0.70662                | 0.68129                   | -0.206                     | -2.08313                  |
| BM1 | K105 <sub>BM1</sub> | -0.81712                | -196.219                | 193.3244                  | -0.43916                   | -4.15077                  |
|     | T87 <sub>BM1</sub>  | -2.44024                | -2.54994                | 3.16956                   | -0.47521                   | -2.29582                  |
|     | K101 <sub>BM1</sub> | -4.38663                | -232.862                | 236.0125                  | -1.01897                   | -2.25526                  |



Table S7 Occupancy of hydrogen bond interactions in the four regions of BM2 and BM1 binding interface in the 89-91A system.

|           | Acceptor              | Donor                    | AvgDist | Occupied (%) |
|-----------|-----------------------|--------------------------|---------|--------------|
| R1 Region | E88 <sub>B</sub> @OE2 | E114 <sub>BM1</sub> @OE2 | 2.86    | 0.02         |
|           | A89 <sub>B</sub> @O   | R105 <sub>BM1</sub> @NH1 | 2.83    | 5.16         |
|           | A90 <sub>B</sub> @O   | R101 <sub>BM1</sub> @NH2 | 2.83    | 7.54         |
|           | A91 <sub>B</sub> @O   | R101 <sub>BM1</sub> @NH2 | 2.81    | 69.09        |
|           | A93 <sub>B</sub> @OE2 | R105 <sub>BM1</sub> @NH2 | 2.79    | 28.61        |
| R2 Region | S82 <sub>B</sub> @O   | K94 <sub>BM1</sub> @NZ   | 2.83    | 4.73         |
|           | D83 <sub>D</sub> @OD2 | K93 <sub>BM1</sub> @NZ   | 2.79    | 6.18         |
| R3 Region | E94 <sub>D</sub> @O   | Y126 <sub>BM1</sub> @OH  | 2.80    | 5.37         |
|           | E94 <sub>D</sub> @OE1 | T80 <sub>BM1</sub> @OG1  | 2.69    | 6.57         |
|           | E94 <sub>D</sub> @OE1 | K75 <sub>BM1</sub> @NZ   | 2.78    | 6.45         |

Table S8 The binding free energies ( $\text{kcal}\cdot\text{mol}^{-1}$ ) contributed by key residues ( $\Delta G_{\text{bind}} \leq -2.0 \text{ kcal}\cdot\text{mol}^{-1}$ ) in the 98-100A system.

|     | Residue             | $\Delta E_{\text{vdW}}$ | $\Delta E_{\text{ele}}$ | $\Delta E_{\text{polar}}$ | $\Delta E_{\text{nonpol}}$ | $\Delta E_{\text{total}}$ |
|-----|---------------------|-------------------------|-------------------------|---------------------------|----------------------------|---------------------------|
| BM2 | E94 <sub>B</sub>    | -0.91                   | -102.93                 | 95.72                     | -0.52                      | -8.63                     |
|     | E88 <sub>D</sub>    | -1.02                   | -69.52                  | 64.18                     | -0.25                      | -6.61                     |
|     | D83 <sub>A</sub>    | -2.11                   | -76.55                  | 74.26                     | -0.55                      | -4.96                     |
|     | M98 <sub>D</sub>    | -4.35                   | 0.06                    | 0.77                      | -0.68                      | -4.22                     |
|     | I85 <sub>A</sub>    | -3.67                   | -0.87                   | 1.52                      | -0.80                      | -3.83                     |
|     | V102 <sub>D</sub>   | -4.58                   | 2.05                    | -0.55                     | -0.68                      | -3.76                     |
|     | L60 <sub>B</sub>    | -3.54                   | -1.01                   | 1.47                      | -0.57                      | -3.65                     |
|     | M98 <sub>B</sub>    | -2.86                   | 0.82                    | -0.35                     | -0.53                      | -2.92                     |
|     | I95 <sub>D</sub>    | -2.68                   | -0.32                   | 0.59                      | -0.39                      | -2.79                     |
|     | T89 <sub>BM1</sub>  | -4.21                   | -13.31                  | 10.68                     | -0.79                      | -7.62                     |
| BM1 | R101 <sub>BM1</sub> | -4.22                   | -189.42                 | 188.69                    | -0.81                      | -5.76                     |
|     | R105 <sub>BM1</sub> | 0.42                    | -181.55                 | 175.93                    | -0.15                      | -5.36                     |
|     | T87 <sub>BM1</sub>  | -2.37                   | -9.06                   | 8.23                      | -0.39                      | -3.59                     |
|     | I97 <sub>BM1</sub>  | -2.77                   | -2.14                   | 2.77                      | -0.51                      | -2.65                     |
|     | K75 <sub>BM1</sub>  | -0.84                   | -149.06                 | 147.89                    | -0.38                      | -2.39                     |
|     | A90 <sub>BM1</sub>  | -2.53                   | -2.38                   | 3.27                      | -0.49                      | -2.13                     |

Table S9 Occupancy of hydrogen bond interactions in the four regions of BM2 and BM1 binding interface in the 98-100A system.

|           | <b>Acceptor</b>        | <b>Donor</b>             | <b>AvgDist</b> | <b>Occupied (%)</b> |
|-----------|------------------------|--------------------------|----------------|---------------------|
| R1 Region | E94 <sub>B</sub> @OE2  | R105 <sub>BM1</sub> @NH1 | 2.80           | 92.16               |
|           | E94 <sub>B</sub> @OE1  | R101 <sub>BM1</sub> @NH1 | 2.76           | 92.12               |
|           | E94 <sub>B</sub> @OE2  | K102 <sub>BM1</sub> @NZ  | 2.78           | 24.84               |
|           | E93 <sub>B</sub> @OE2  | K102 <sub>BM1</sub> @NZ  | 2.78           | 20.33               |
|           | E88 <sub>B</sub> @OE1  | K102 <sub>BM1</sub> @NZ  | 2.84           | 8.36                |
|           | E106 <sub>B</sub> @OE1 | R101 <sub>BM1</sub> @NH2 | 2.77           | 55.23               |
|           | H109 <sub>B</sub> @OXT | R104 <sub>BM1</sub> @NH1 | 2.80           | 40.92               |
| R2 Region | G89 <sub>D</sub> @O    | K93 <sub>BM1</sub> @NZ   | 2.81           | 14.71               |
|           | D83 <sub>B</sub> @OD2  | K94 <sub>BM1</sub> @NZ   | 2.80           | 0.64                |
|           | I95 <sub>D</sub> @O    | T89 <sub>BM1</sub> @OG1  | 2.77           | 66.39               |
|           | E88 <sub>C</sub> @O    | T88 <sub>BM1</sub> @OG1  | 2.77           | 67.20               |
| R3 Region | H109 <sub>C</sub> @NE2 | G81 <sub>BM1</sub> @OE1  | 2.81           | 0.18                |
|           | T101 <sub>C</sub> @OG1 | D54 <sub>BM1</sub> @N    | 2.90           | 40.06               |
|           | E106 <sub>C</sub> @OE2 | R50 <sub>BM1</sub> @NH2  | 2.82           | 42.52               |
